# Supplementary material for: Effect of Initial Switch-On Within 24 Hours of Cochlear Implantation Using Slim Modiolar Electrodes: Potential Clinical Implications
Source: Research Square preprint supplement (doi:10.21203/rs.3.rs-257630/v1), 2021-03-10
Supplement: Supplementary file 1 [file 4d18088ca7a7a9308db346c2.docx]

**Supplementary Table S1. Median impedance values of all channels of slim modiolar electrodes under CG mode.**

|  | **Period 1** | | **Period 2** | | **Period 3** | | **Period 4** | | **Period 5** | | **Period 6** | | **Period 7** | |
| --- | --- | --- | --- | --- | --- | --- | --- | --- | --- | --- | --- | --- | --- | --- |
| **Conventional** | **Early** | **Conventional** | **Early** | **Conventional** | **Early** | **Conventional** | **Early** | **Conventional** | **Early** | **Conventional** | **Early** | **Conventional** | **Early** |
| **Basal Electrodes** | | | | | | | | | | | | | | |
| **CH 01** | 10.74 | 12.09 | 12.80 | 4.19 | 12.74 | 7.43 | 9.88 | 7.82 | 9.48 | 7.63 | 9.04 | 8.18 | 9.14 | 8.39 |
| **CH 02** | 11.38 | 12.29 | 13.46 | 4.31 | 12.97 | 7.40 | 9.52 | 7.66 | 9.31 | 7.51 | 8.54 | 7.94 | 8.57 | 7.85 |
| **CH 03** | 11.79 | 12.25 | 14.08 | 4.30 | 13.24 | 7.94 | 9.65 | 7.88 | 9.36 | 8.00 | 8.44 | 8.19 | 8.56 | 7.95 |
| **CH 04** | 11.56 | 12.48 | 13.97 | 4.54 | 13.34 | 8.24 | 9.58 | 8.22 | 9.10 | 8.07 | 8.11 | 8.60 | 8.32 | 7.90 |
| **CH 05** | 11.42 | 12.54 | 14.53 | 4.55 | 13.10 | 8.01 | 9.45 | 8.29 | 8.91 | 7.85 | 7.83 | 8.03 | 8.03 | 7.78 |
| **CH 06** | 11.73 | 12.63 | 14.28 | 4.47 | 13.06 | 8.06 | 9.45 | 8.08 | 8.96 | 7.82 | 7.65 | 7.83 | 7.97 | 7.55 |
| **CH 07** | 11.43 | 12.06 | 14.70 | 4.46 | 12.75 | 8.05 | 9.39 | 8.11 | 8.90 | 7.77 | 7.50 | 8.17 | 7.89 | 7.45 |
| **Mean**  **(95% CI)** | 11.44  (11.2-11.67) | 12.33  (12.01-12.66) | 13.97  (13.57-14.38) | 4.4  (4.3-4.51) | 13  (12.71-13.29) | 7.94  (7.64-8.25) | 9.56  (9.3-9.82) | 8.01  (7.71-8.3) | 9.15  (8.91-9.39) | 7.81  (7.45-8.17) | 8.16  (7.92-8.4) | 8.13  (7.73-8.54) | 8.35  (8.08-8.63) | 7.84  (7.49-8.19) |
| **Mid-portion Electrodes** | | | | | | | | | | | | | | |
| **CH 08** | 10.62 | 11.51 | 13.32 | 4.36 | 12.56 | 7.91 | 9.29 | 8.24 | 8.64 | 7.83 | 7.31 | 8.09 | 7.67 | 7.52 |
| **CH 09** | 10.43 | 11.26 | 13.23 | 4.20 | 12.60 | 7.92 | 9.04 | 8.14 | 8.47 | 7.67 | 7.13 | 7.97 | 7.63 | 7.48 |
| **CH 10** | 10.19 | 11.00 | 13.60 | 4.21 | 12.53 | 8.05 | 8.97 | 8.11 | 8.48 | 7.68 | 7.10 | 7.52 | 7.55 | 7.46 |
| **CH 11** | 10.26 | 10.79 | 13.82 | 4.18 | 12.64 | 8.00 | 8.89 | 7.72 | 8.29 | 7.34 | 6.85 | 7.37 | 7.28 | 7.48 |
| **CH 12** | 10.23 | 10.54 | 14.13 | 4.33 | 12.52 | 7.98 | 8.86 | 7.94 | 8.14 | 7.28 | 6.72 | 7.71 | 7.24 | 7.35 |
| **CH 13** | 10.50 | 10.86 | 14.66 | 4.45 | 12.76 | 7.98 | 8.95 | 7.96 | 8.23 | 7.40 | 6.77 | 7.77 | 7.44 | 7.30 |
| **CH 14** | 10.49 | 11.34 | 14.95 | 4.59 | 12.98 | 8.41 | 9.12 | 8.02 | 8.38 | 7.76 | 6.88 | 7.86 | 7.56 | 7.95 |
| **Mean**  **(95% CI)** | 10.39  (10.18-10.59) | 11.04  (10.75-11.33) | 13.96  (13.69-14.22) | 4.33  (4.23-4.43) | 12.74  (12.47-13) | 8.14  (7.89-8.38) | 9.02  (8.77-9.26) | 8.02  (7.77-8.27) | 8.37  (8.13-8.62) | 7.57  (7.22-7.91) | 6.96  (6.75-7.18) | 7.76  (7.42-8.09) | 7.48  (7.24-7.72) | 7.51  (7.11-7.9) |
| **Apical Electrodes** | | | | | | | | | | | | | | |
| **CH 15** | 10.39 | 11.34 | 14.83 | 4.60 | 13.11 | 8.62 | 9.37 | 8.29 | 8.57 | 7.88 | 7.10 | 7.95 | 7.74 | 7.75 |
| **CH 16** | 9.94 | 11.04 | 13.86 | 4.51 | 13.13 | 8.71 | 9.23 | 8.45 | 8.48 | 7.78 | 7.17 | 8.22 | 7.59 | 7.52 |
| **CH 17** | 9.95 | 10.87 | 14.28 | 4.39 | 13.15 | 8.63 | 9.33 | 8.35 | 8.46 | 7.69 | 7.15 | 8.33 | 7.60 | 7.59 |
| **CH 18** | 10.02 | 11.19 | 14.32 | 4.56 | 13.21 | 8.82 | 9.53 | 8.55 | 8.56 | 7.77 | 7.32 | 8.13 | 7.51 | 7.78 |
| **CH 19** | 9.40 | 10.53 | 14.34 | 4.50 | 13.06 | 8.67 | 9.13 | 8.78 | 8.43 | 7.83 | 7.25 | 8.26 | 7.30 | 7.64 |
| **CH 20** | 9.11 | 10.21 | 14.54 | 4.51 | 12.95 | 8.60 | 9.27 | 8.59 | 8.47 | 7.41 | 7.15 | 7.89 | 7.62 | 7.17 |
| **CH 21** | 8.20 | 9.69 | 14.42 | 4.61 | 13.21 | 8.78 | 9.41 | 8.80 | 8.72 | 7.40 | 7.65 | 7.92 | 7.95 | 7.33 |
| **CH 22** | 9.31 | 10.00 | 14.75 | 4.49 | 13.41 | 8.77 | 9.60 | 8.06 | 8.65 | 7.27 | 7.53 | 7.44 | 7.62 | 6.78 |
| **Mean**  **(95% CI)** | 9.54  (9.32-9.76) | 10.61  (10.31-10.91) | 14.42  (14.05-14.79) | 4.52  (4.42-4.62) | 13.11  (12.88-13.34) | 8.59  (8.34-8.84) | 9.36  (9.15-9.57) | 8.48  (8.26-8.7) | 8.54  (8.33-8.75) | 7.63  (7.31-7.95) | 7.29  (7.09-7.49) | 8.02  (7.75-8.29) | 7.62  (7.34-7.89) | 7.45  (7.1-7.79) |
| **Total Electrodes** | | | | | | | | | | | | | | |
| **Mean**  **(95% CI)** | 10.41  (10.28-10.55) | 11.3  (11.11-11.48) | 14.13  (13.92-14.34) | 4.42  (4.36-4.48) | 12.96  (12.81-13.11) | 8.24  (8.08-8.4) | 9.31  (9.18-9.45) | 8.18  (8.04-8.33) | 8.68  (8.55-8.82) | 7.66  (7.47-7.86) | 7.46  (7.33-7.59) | 7.97  (7.78-8.16) | 7.81  (7.65-7.96) | 7.59  (7.38-7.8) |
